# Supplementary material for: Histones predate the split between bacteria and archaea
Source: Oxford University Press journal article supplement (doi:10.1093/bioinformatics/bty1000), 2018-12-05
Supplement: bioinformatics_35_14_2349_s4.pdf [file bioinformatics_35_14_2349_s4.pdf]

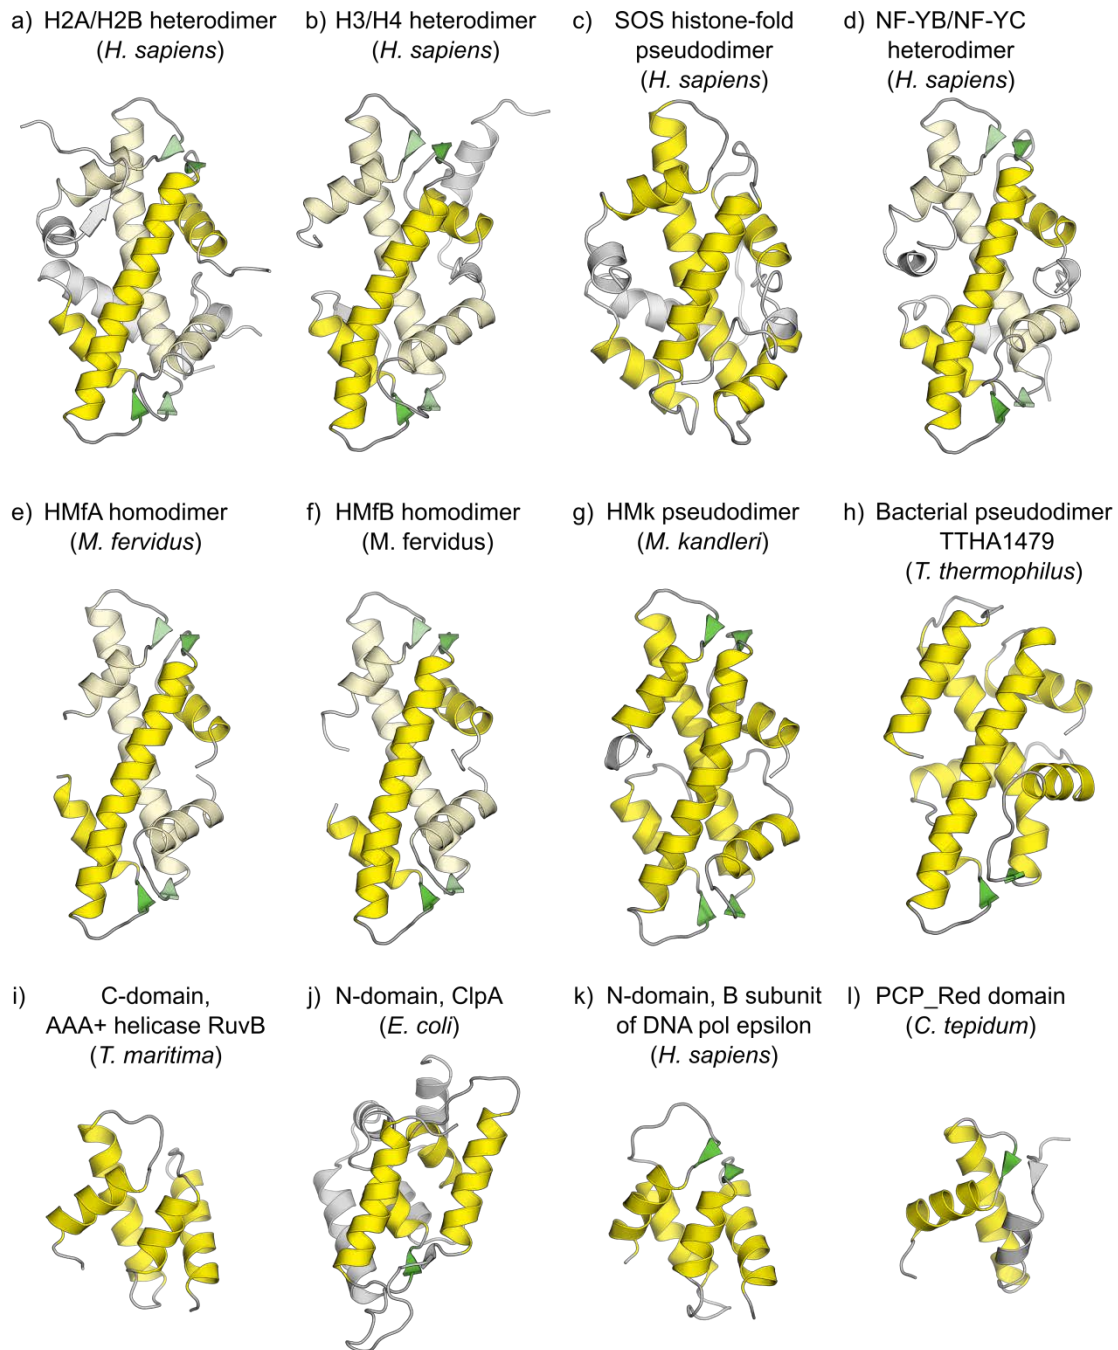

**Supplementary Fig. S1.** A gallery of histone-fold proteins. Structural representatives of archaeal, bacterial, and eukaryotic histone-fold proteins as well as their distant homologs are shown in cartoon representation. In all structures,  $\alpha$ -helices are colored in yellow,  $\beta$ -strands in green, and regions not part of or homologous to the histone fold are colored in grey. In homodimeric and heterodimeric structures,  $\alpha$ -helices and  $\beta$ -strands in one of the subunits are shown in lighter shades of yellow and green, respectively. Accession information for the shown structures is provided in Supplementary Data S1.

**Supplementary Data S1:** accession information for representatives used for the analyses shown in Figs. 1 and 2 as well as for the structures shown in the Supplementary Fig. S1. In sequences of pseudodimers, the two halves are underlined.

### Eukaryotic histone-fold proteins

>SCOPE d2cv5c1 a.22.1.1 (C:11-118) Histone H2A {Human (Homo sapiens), H2A.a [TaxId: 9606]}

RAKAKTRSSRAGLQFPVGRVHRLLRKGNYSERVGAGAPVYLAADVLEYLTAEILELAGNAARDNKKTRIIP  
RHLQLAIRNDEELNKLGRVTIAQGGVLPNIQAVLLPK

>SCOPE d2cv5d1 a.22.1.1 (D:27-122) Histone H2B {Human (Homo sapiens), H2B.k [TaxId: 9606]}

KRSRKESYSVYVYKVLKQVHPDTGISSKAMGIMNSFVNDIFERIAGEASRLAHYNKRSTITSREIQTAVR  
LLLPGELAKHAVSEGTKAVTKYTSK

>SCOPE d2cv5a\_ a.22.1.1 (A:) Histone H3 {Human (Homo sapiens) [TaxId: 9606]}

PHRYRPGTVALREIRRYQKSTELLIRKLPFQRLVREIAQDFKTDLRFQSSAVMALQEACEAYLVGLFEDT  
NLCAIHAKRVTIMPKDIQLARRIRGER

>SCOPE d2cv5b\_ a.22.1.1 (B:) Histone H4 {Human (Homo sapiens) [TaxId: 9606]}

NIQGITKPAIRRLARRGGVKRISGLIYEETRGLKVFLENVIRDAVITYTEHAKRKTVTAMDVVYALKRQG  
RTLYGFGG

>ECOD e3vh5A1 A:5-104 000148505; CENP-S

AGGEQRELLIQLRLAAVHYTTGALAQDVAEDKGVLFQSKQTVAAISEITFRQAENFARDLEMFARHA  
KRSTITSEDVKLLARRSNSLLKYITQKSDELASS

>ECOD e3vh5D2 D:7-81 001273187; CENP-X

GGFRKETVERLLRLHFRDGRTRVNGDALLLMAELLKVFVREAAAAARAARQAQAEDEKVDIEHVEKVLPL  
LLDFV

>ECOD e3vh5T1 T:1-91 000985373; CENP-T

GSTREPEIASSLIKQIFSHYVKTPTVTRDAYKIVEKASERYFKQISSDLEAYSQHAGRKTVMADVELLMR  
RQGLVTDKMPHLVHLVERHLPL

>ECOD e3vh5W1 W:3-77 000148506; CENP-W

RRTVPRGTLRKIIKHKHPLRLAANTDLLVHLSFLLFLHRLAEEARTNAFENKSKIIPKPEHTIAAAKVIL  
KKSRRG

>SCOPE d2bykb1 a.22.1.3 (B:11-99) Chrac-14 {Fruit fly (Drosophila melanogaster) [TaxId: 7227]}

MVERIEDLNLNPNVIGRLIKEALPESASVSKEARAAIARAASVFAIFVTSSSTALAHKQNHKTITAKDIL  
QTLTELDFESFVPSLTQDLEVYRKVVKEKESKASKKDSNTAENANASATATAEEEAPE

>SCOPE d2byka1 a.22.1.3 (A:29-100) Chrac-16 {Fruit fly (Drosophila melanogaster) [TaxId: 7227]}

MGEPRSQPPVERPPTAETFLPLSRVRTIMKSSMDTGLITNEVLFLMTKCTELFVRHLGAAAYTEEFQRP  
GEALKYEHLQVNVNKNKLEFLLQIVPQKIRVHQFQEMRLNRSAGSDDDDDDDDDDDEESESSESSE

>SCOPE dlq9ca\_ a.22.1.3 (A:) Histone domain of Son of sevenless protein {Human (Homo sapiens)}

MQAQQLPYEFFSEENAPKWRGLLVPAKVKVQGVHPTLESNDDALQYVEELILQLLNMLCQAQPRASADV  
EERVQKSFPHPIDKWAIAADAQSAIEKRKRNRNPLSLPVEKIHPLLKEVLYGKIDHQVSVYIVAVLEYISAD  
ILKLVGNYVRNIRHYEITKQDIKIVAMCADKVLMDMFHQDVEDINILSLTDE

>SCOPE dljfia\_ a.22.1.3 (A:) Negative cofactor 2, NC2, alpha chain {Human (Homo sapiens) [TaxId: 9606]}

ARFPPARIKKIMQTDDEEIGKVAAAVPVIIISRALELFLESLLKKACQVTQSRNAKTMTTSHLKQCIE

>SCOPE dljfib\_ a.22.1.3 (B:) Negative cofactor 2, NC2, beta chain {Human (Homo sapiens) [TaxId: 9606]}

DDLTIPRAAINKMIKETLPNVRVANDARELVVNCCTEFIHLLISSEANEICNKSEKKTISPETHVIAQALESL  
GFGSYISEVKEVLQECKTVALKRRKASSRLENLGIPEEELLRQQQELFAKARQQQAELAQQEWLQ

>SCOPE dlnlja\_ a.22.1.3 (A:) Nuclear transcription factor Y subunit beta (Nf-Yb3) {Human (Homo sapiens) [TaxId: 9606]}

IYLPANVARIMKNAIPQTGKIAKDAKECVQECVSEFISFITSEASERCHQEKRKTINGEDILFAMSTLG  
FDSYVEPLKLYLQKFRE

>SCOPE dlnljb\_ a.22.1.3 (B:) Nuclear transcription factor Y subunit gamma (Nf-Yc2) {Human (Homo sapiens) [TaxId: 9606]}

LPLARIKKIMKLDEEDVKMISAEAPVLFAKAAQIFITELTLRAWIHTEDNKRRRTLQRNDIAMAITKFDQFD  
FLIDIVPR

>SCOPE dlh3oa\_ a.22.1.3 (A:) TAF(II)-135, (TAF(II)-130, hTAF4), histone fold domain {Human (Homo sapiens) [TaxId: 9606]}

MFLQLQAPLQRRILEIGKKHGITELHPDVVSYSVSHATQQRQLQNLVEKISETAQQKNFSYKDDDRYEQASDV  
RAQLK

>SCOPE dlh3ob1 a.22.1.3 (B:57-128) TAF 12, TAF(II)-20, (TAF(II)-15, hTAF12), histone fold domain {Human (Homo sapiens) [TaxId: 9606]}

VLTKKKLQDLVREVPNEQLDEEDVEEMLLQIADDFIESVVTAAACQLARHRKSSTLEVKDVLHLERQWNM  
WI

>SCOPE dlbh8a\_ a.22.1.3 (A:) TAF13, TAF(II)18 {Human (Homo sapiens) [TaxId: 9606]}

MADEEEDPTFEENEENEIGGGAEGGQGRKRLFSKELRCMMYGFQDDQNPYTESVDILEDLVIEFITEMTH  
KAMSIGRQGRAQVEDIVFLIRKDPKRFARVKDLLTMNEELKRARKAFDEANYGS

>SCOPE dlbh8b\_ a.22.1.3 (B:) TAF11, TAF(II)28 {Human (Homo sapiens) [TaxId: 9606]}

FSEEQLNRYEMYRRSAFPKAAIKRLIQSITGTSVSNVVIAMSGISKVVFVGEVVEEALDVCEKWGEMPPPL  
QPKHMREAVRRLKSKGQIP

>SCOPE dltafa\_ a.22.1.3 (A:) TAF9, TAF(II)42 {Fruit fly (Drosophila melanogaster) [TaxId: 7227]}

PKDAQVIMSILKELNVQYEYEPVVNQLEFFRYVTSILDDAKVYANHARKKTIDLDDVRLATEVTLD

>SCOPE dltafb\_ a.22.1.3 (B:) TAF6, TAF(II)62 {Fruit fly (Drosophila melanogaster) [TaxId: 7227]}

MLYGSSISAESMKVIAESIGVGLSDDAAKELAEDVSIKLRIVQDAAKFMNHAKRQKLSVRDIDMSLKV

>ECOD e4wv4A1 A:3-102 001492373; TAF10  
STPLVDFLMQLEDYTPPTIPDAVTGYLNRAGFEASDPRIIRLISLAAQKFISDIANDALQHCKMKGTSAG  
SSRSKSKDRKYTLTMEDLTPALSEYGINVK

>ECOD e4wv4B1 B:5-76 001492374; TAF8  
NYHLARRRTLQVVVSSLLTEAGFESA EKASVETLTEM LQSYISEIGRS AKSYCEHTARTQPTLS DIVVTL  
VE

### Archaeal HMfB-like

>SCOPE d1b67a\_ a.22.1.2 (A:) Archaeal histone HMfA {Methanothermus  
fervidus, histone A [TaxId: 2180]}  
MGELPIAPIGRIIKNAGAERVSDDARIALAKVLEEMGEEIASEAVKLAKHAGRKTIKAEDIELARKMFK

>SCOPE d1a7wa\_ a.22.1.2 (A:) Archaeal histone HMfB {Methanothermus  
fervidus, histone B [TaxId: 2180]}  
MELPIAPIGRIIKDAGAERVSDDARITLAKILEEMGRDIASEAIKLARHAGRKTIKAEDIELAVRRFKK

>SCOPE d1f1ea\_ a.22.1.2 (A:) Archaeal histone HMk {Methanopyrus kandleri  
[TaxId: 2320]}  
MAVELPKAAIERIFRQIGERRLSQDAKDTIYDFVPTMAEYVANAAKSVLDASGKKTLMEEHLKALADVL  
MVEGVEDYDGE LFG RATVRRILKRAGIERASSDAVDLYNKLICRATEELGEKAAEYADEDGRKTVQGEDV  
EKAITYSMPKGGEL

### Bacterial single histone fold-like proteins

>NP\_712639.2 hypothetical protein LA\_2458 [Leptospira interrogans serovar  
Lai str. 56601]  
MAGKNVERETLIVTSKVKAYIKSKGFMTSGDAIDGLNEKIHQLIDDAVKRTE SNKRSTVRPTDF

>WP\_011162677.1 hypothetical protein [Bdellovibrio bacteriovorus]  
MAEVLVVTSKVKLIKEKGMNTSAETIDVLSKAIEQLCLKGVESAKADGRKTVMARDIVIDHL

>WP\_006975389.1 hypothetical protein [Plesiocystis pacifica]  
MARKSTKQEILVVGSKVKAIVRDAGLRSDGELVAALSGRVHAMLEGAIVRCTRNM RSTVRPQDL

### Bacterial pseudodimeric histone-fold proteins

>SCOPE d1r4va\_ a.22.1.4 (A:) Hypothetical protein Aq\_328 {Aquifex aeolicus  
[TaxId: 63363]}  
MQEKYNFGKVSSQHKNYSKIETMLRPKGFDKLDHYFRTELDIDDLTDETI ELLLSVKA AAFGKLFYGAEQR  
ARWNGRDFIALADLNITKALEEHIKNFQKIEQDMGVDELLEYIAFIPPVEMNVGEDLKSEYRNIMGLLLL  
MHADVIKKATGERKPSREAMEFVAQIVDKVF

>SCOPE dlwwia1 a.22.1.4 (A:1-148) Hypothetical protein TTHA1479 {Thermus  
thermophilus [TaxId: 274]}  
MLMKVAEFERLFRQAAGLDVDKNDLKRVSDFLRNKLYDLLAVAERNAKYNGRD LIFEPDLP IAKGLQETL  
QEFRMDTALELKPVLDALAALPPLDLEVAEDVRNLLPELAGALVVAYARVLKELDPALKNPQTEHHERA  
ERVFNLLL

## Distant homologs

>ECOD e1in4A2 A:180-254 000003427; AAA+ C-domain  
YTVKELKEIIKRAASLMDVEIEDAAAEMIAKRSRGTPRIAIRLTKRVRDMLTVVKADRINTDIVLKTMEV  
LNIDD

>ECOD e1k6kA1 A:1-142 000003424; Clp N-domain  
MLNQELELSLNMAFARAREHRHEFMTVEHLLLALLSNPSAREALEACSVDLVALRQELEAFIEQTTPVLP  
ASEEEERDTQPTLSFQRVLQRAVFHVQSSGRNEVTGANVLVAIFSEQESQAAYLLRKHEVSRLDVVNFISH  
GT

>ECOD e2v6zM1 M:25-99 000168577; Dpoe2NT  
MAPERLRSRALSAFKLRGLLLRGEAIKYLTEALQSISELELEDKLEKI INAVEKQPLSSNMIERSVVEAA  
VQESS

>ECOD e2kruA1 A:2-55 000138180; PCP\_red  
MGELSWTAEAEKMLGKVPPFFVRKKVVRKNTDNYAREIGEPVVTADVFRKAKEHLGGLEHHHHHH

## Supplementary Data S2: Accession information for sequences shown in Fig. 3.

### Eukaryotic nucleosome core histones

>AAA63191.1 histone H2A.1 [Homo sapiens]  
MSGRGKQGGKARAKAKTRSSRAGLQFPVGRVHRLLRKGNYSERVGAGAPVYLAADVLEYLTAEILELAGNA  
ARDNKKTRIIIPRHLQLAIRNDEELNKKLLGRVTTIAQGGVLPNIQAVLLPKKTESHHKAKGK

>CAB02542.1 histone H2B [Homo sapiens]  
MPEPAKSAPAPKKGSKKAVTKAQKKDSKKRKRSRKESYSVYVYKVLKQVHPDTGISSKAMGIMNSFVNDI  
FERIAGEASRLAHYNKRSTITSREIQTAVRLLLLPGELAKHAVSEGTKAVTKYTSSK

>NP\_003520.1 histone H3.1 [Homo sapiens]  
MARTKQTARKSTGGKAPRKQLATKAARKSAPATGGVKKPHRYRPGTVALREIRRYQKSTELLIRKLPFQR  
LVREIAQDFKTDLRFQSSAVMALQEACEAYLVGLFEDTNLCAIHAKRVTIMPKDIQLARRIRGERA

>NP\_003529.1 histone H4 [Homo sapiens]  
MSGRGKGGKGLGKGGAKRHRKVLDRNIQGITKPAIRRLARRGGVKRISGLIYEETRGLKVFLENVIRDA  
VTTYEHAKRKTVTAMDVVYALKRQGRRTLYGFGG

### Archaeal HMfB-like histones

>WP\_013413995.1 histone family protein HMfA [Methanothermus fervidus]  
MGELPIAPIGRIIKNAGAERVSDDARIALAKVLEEMGEEIASEAVKLA KHAGRKTIKAEDIELARKMFK

>sp|P19267.1|HMFB\_METFE RecName: Full=DNA-binding protein HMf-2; AltName:  
Full=Archaeal histone B  
MELPIAPIGRIIKDAGAERVSDDARITLAKILEEMGRDIASEAIKLARHAGRKTIKAEDIELAVRRFVK

>WP\_048053612.1 histone [Pyrococcus horikoshii]  
MGELPIAPVDRLIRKAGAERVSEQAQKVLAEYLEEYAEIETIAKKAVEFARHAGRKTIVKVEDIKLAIS

>WP\_011012868.1 histone [Pyrococcus furiosus]  
MGELPIAPVDRLIRKAGAQRVSEQAQKVLAEHLLEEKAEIETIAKKAVDLAKHAGRKTIVKVEDIKLAIS

### Prokaryotic single histone fold-like proteins

#### Bacteria

>WP\_006975389.1 hypothetical protein [Plesiocystis pacifica]  
MARKSTKQEILVVGSKVKAIVRDAGLRSDGELVAALSGRVHAMLEGAIVRCTRNMNRSTVVRPQDL

>WP\_052547863.1 hypothetical protein [Enhygromyxa salina]  
MAAKKKTAKTKKAREIVVVGSKVKDVVRAAGYRSDGELVQAVSEKVVHEMLEAAIKRAESNKRGTVVRPYDL

>WP\_096326703.1 hypothetical protein [Nannocystis exedens]  
MATKNKAPKEILVVGSKVKDVIRDAGLRSDGELIQAVSDKVHELLGAAIERCKSNRSTVVRPYDL

>KPJ56806.1 hypothetical protein AMS16\_01810 [Planctomycetes bacterium  
DG\_58]  
MAKDMLVVGSKVKAYLKSSGMKTAGDTLAAVSDKVYAMLDAAVERTKANKRATVVRPQDL

#### Archaea

>WP\_099254152.1 DUF1931 domain-containing protein [Halorubrum persicum]  
MSDLIVKAAVKDALSDHNVSADFYDALNEEVAELLDAAERAETNGRKTVQPRDL

>AAF03226.1 ORF6 [Pyrococcus furiosus]  
MEVKEMVELLVKSKVKEFVSSIDKDMRVSPPEFYEALEAEVKALIEKAVKRAQAEGRKTLYARHV

>WP\_011249991.1 hypothetical protein [Thermococcus kodakarensis]  
MAEMLVKSKVKEFVKSVDPEMRVSPPEFYDALEAEVKALVEKAIKRAQAEGRKTLYARHV

>KHO49746.1 hypothetical protein QT01\_C0002G0030 [archaeon GW2011\_AR6]  
MELVIKSKLKDAVKGLRVSSSELAELNKKVEAMLKEAAERAKANHRGTVMPQDL

## Prokaryotic pseudodimeric histone-fold proteins

### Bacteria

>NP\_213225.1 hypothetical protein aq\_328 [Aquifex aeolicus VF5]  
MQEKYNFGKVSSQHKYNSKIETMLRPGKGFDKLDHYFRTELDIDLTDETIELLLNSVKAAGFKLFYGAEQR  
ARWNGRDFIALADLNITKALEEHKFNQKIEQDMGVDELLEYIAFIPPVEMNVGEDLKSEYRNIMGLLLL  
MHADVIKKATGERKPSREAMEFVAQIVDKVF

>YP\_144745.1 hypothetical protein TTHA1479 [Thermus thermophilus HB8]  
MLMKVAEFERLFRQAAGLDVVDKNDLKRVSDFLRNKLYDLLAVAERNAKYNGRDLIPEPDLPIAKGLQETL  
QEFRMDTALELKPVLDALAALPPLDLEVAEDVRNLLPELAGALVVAYARVLKELDPALKNPQTEHHERA  
ERVFNLLL

>WP\_012409489.1 DUF1931 family protein [Nostoc punctiforme]  
MSVISISKFERFFRTVAGLDVVDKNDLKRYSDFVNHKTYDLLLLRGQATAKANGRDIIEPFDVPITKGLEER  
IHNFKIEINEEIELKPILEDMYTTTRPLDLLDYSKETEARLSDIVGGLSVALARTFKIIDPALKNPQTMQWER  
AFSIFDLLLL

>WP\_041939166.1 DUF1931 family protein [Frankia alni]  
MPVMGVTRFERFFRIAAGLDMDKNDVKRYGDFVNKVVYDLLLLMAQATAKANVRDVIEPWLDPITKGLQES  
IHHRFDLDEEIELRPILEQIAARPPDLLALSDDTAARLPLIVGGLSLALARAFTIIEPELKNPQPSEWER  
VSRIFDLLLL

### Archaea

>WP\_050003266.1 DUF1931 family protein [Thermococcus eurythermalis]  
MAEMIIPYPQLQKILERTCELAVIKPRAEEMMEIVEKKLADLFEVAYENAKAERSSTIKMRHIPITKGFK  
NSLNLFRAVIEDEKVEIEPIRKYVLRKIPGDIPLLEEDVVNELPIIAGTLFVVLVGRVIKALHPEIKNVYPE  
HIEEAKKVLDTL

>WP\_011011744.1 DUF1931 family protein [Pyrococcus furiosus]  
MAEMVIPYPHLQRILEKTCELAVTKPAERMMEIVERKLADLFEVAYENATAENSETIKMRHIPITKGFR  
SSMNLFRAVIEDENIKIEPILDYVLRKIPADKPLEEEVINELPIITGTLFVVLIGRVIKALHPEVRNVYPE  
HIEEAEKVLDTL

>WP\_012941033.1 DUF1931 family protein [Archaeoglobus profundus]  
MAEMIIPYPQLKILEDTCELDVYKAEASKMMDIVERKLADLFEVAYDKARAEGREMIMFRDLPLTKGFL  
NSMELFRKAIERQNVVDEPIKKFVLKGLPVDAPLQDELVDLPIITGTLFVVLIGRVIKALHPDVERVKDE  
HIDEARRVLDTL

>WP\_010871032.1 DUF1931 family protein [Methanocaldococcus jannaschii]  
MAEMIIPYPQLKIMKTTCEIDLYKTEAEDIMDVVEKKLADLFEVAHRNAKEENAKI IKMRHIPITKGFL  
NSMELFRSVIEEENIVAETIKKYVMKKIPGDLPLDDIVVDNLPLITGTIFIVVGRVIKALHEDIERIRKE  
HIEEAKKVLDTL
